# Universal Definition of Loss to Follow-Up in HIV Treatment Programs: A Statistical Analysis of 111 Facilities in Africa, Asia, and Latin America

Benjamin H. Chi<sup>1,2\*</sup>, Constantin T. Yiannoutsos<sup>3</sup>, Andrew O. Westfall<sup>1,2</sup>, Jamie E. Newman<sup>4</sup>, Jialun Zhou<sup>5</sup>, Carina Cesar<sup>6</sup>, Martin W. G. Brinkhof<sup>7</sup>, Albert Mwango<sup>8</sup>, Eric Balestre<sup>9</sup>, Gabriela Carriquiry<sup>10</sup>, Thira Sirisanthana<sup>11</sup>, Henri Mukumbi<sup>12</sup>, Jeffrey N. Martin<sup>13</sup>, Anna Grimsrud<sup>14</sup>, Melanie Bacon<sup>15</sup>, Rodolphe Thiebaut<sup>9</sup>, on behalf of the International Epidemiologic Databases to Evaluate AIDS Collaboration

**1** University of Alabama at Birmingham, Birmingham, Alabama, United States of America, **2** Centre for Infectious Disease Research in Zambia, Lusaka, Zambia, **3** Indiana University, Indianapolis, Indiana, United States of America, **4** RTI International, Research Triangle Park, North Carolina, United States of America, **5** The Kirby Institute, University of New South Wales, Sydney, New South Wales, Australia, **6** Fundación Huésped, Buenos Aires, Argentina, **7** University of Bern, Bern, Switzerland, **8** Zambian Ministry of Health, Lusaka, Zambia, **9** INSERM U897, Bordeaux Segalen University ISPED, Bordeaux, France, **10** Instituto de Medicina Tropical Alexander von Humboldt, Universidad Peruana Cayetano Heredia, Lima, Peru, **11** Chiang Mai University, Chiang Mai, Thailand, **12** Amo-Congo, Kinshasa, Democratic Republic of the Congo, **13** University of California at San Francisco, San Francisco, California, United States of America, **14** University of Cape Town, Cape Town, South Africa, **15** National Institutes of Health, Bethesda, Maryland, United States of America

## Abstract

**Background:** Although patient attrition is recognized as a threat to the long-term success of antiretroviral therapy programs worldwide, there is no universal definition for classifying patients as lost to follow-up (LTFU). We analyzed data from health facilities across Africa, Asia, and Latin America to empirically determine a standard LTFU definition.

**Methods and Findings:** At a set “status classification” date, patients were categorized as either “active” or “LTFU” according to different intervals from time of last clinic encounter. For each threshold, we looked forward 365 d to assess the performance and accuracy of this initial classification. The best-performing definition for LTFU had the lowest proportion of patients misclassified as active or LTFU. Observational data from 111 health facilities—representing 180,718 patients from 19 countries—were included in this study. In the primary analysis, for which data from all facilities were pooled, an interval of 180 d (95% confidence interval [CI]: 173–181 d) since last patient encounter resulted in the fewest misclassifications (7.7%, 95% CI: 7.6%–7.8%). A secondary analysis that gave equal weight to cohorts and to regions generated a similar result (175 d); however, an alternate approach that used inverse weighting for cohorts based on variance and equal weighting for regions produced a slightly lower summary measure (150 d). When examined at the facility level, the best-performing definition varied from 58 to 383 d (mean = 150 d), but when a standard definition of 180 d was applied to each facility, only slight increases in misclassification (mean = 1.2%, 95% CI: 1.0%–1.5%) were observed. Using this definition, the proportion of patients classified as LTFU by facility ranged from 3.1% to 45.1% (mean = 19.9%, 95% CI: 19.1%–21.7%).

**Conclusions:** Based on this evaluation, we recommend the adoption of  $\geq 180$  d since the last clinic visit as a standard LTFU definition. Such standardization is an important step to understanding the reasons that underlie patient attrition and establishing more reliable and comparable program evaluation worldwide.

Please see later in the article for the Editors’ Summary.

**Citation:** Chi BH, Yiannoutsos CT, Westfall AO, Newman JE, Zhou J, et al. (2011) Universal Definition of Loss to Follow-Up in HIV Treatment Programs: A Statistical Analysis of 111 Facilities in Africa, Asia, and Latin America. *PLoS Med* 8(10): e1001111. doi:10.1371/journal.pmed.1001111

**Academic Editor:** John Bartlett, Duke University Medical Center, United States of America

**Received:** April 13, 2011; **Accepted:** September 14, 2011; **Published:** October 25, 2011

This is an open-access article, free of all copyright, and may be freely reproduced, distributed, transmitted, modified, built upon, or otherwise used by anyone for any lawful purpose. The work is made available under the Creative Commons CC0 public domain dedication.

**Funding:** The International Epidemiologic Databases to Evaluate AIDS (IeDEA) collaboration is funded jointly by the National Institute of Allergy and Infectious Diseases, the National Cancer Institute, and the Eunice Kennedy Shriver National Institute of Child Health and Human Development through the following grants: Central African region (U01AI069927), Eastern African region (U01AI069919), Southern African region (U01AI069924), Western African region (U01AI069919), Asia/Pacific region (U01AI069907), and Caribbean, Central American, and South American region (U01AI069923). The TREAT Asia HIV Observation Database, a contributor to the Asia/Pacific IeDEA region, is jointly supported by the Foundation for AIDS Research (amfAR), the Dutch Ministry of Foreign Affairs, and Stichting Aids Fonds. Additional salary and trainee support was provided by the US National Institutes of Health (D43-TW001035; P30-AI027767) and the Doris Duke Charitable Foundation (2007061). No funding bodies had any role in study design, data collection and analysis, decision to publish, or preparation of the manuscript.

**Competing Interests:** The authors have declared that no competing interests exist.

**Abbreviations:** ART, antiretroviral therapy; CI, confidence interval; IeDEA, International Epidemiologic Databases to Evaluate AIDS; LTFU, lost to follow-up

\* E-mail: bchi@cidrz.org

## Introduction

Unprecedented gains have been made in the expansion of services for antiretroviral therapy (ART) in resource-constrained settings. The United Nations Joint Programme for HIV/AIDS (UNAIDS) now estimates that more than 5 million HIV-infected adults and children have initiated HIV treatment worldwide, a 13-fold increase since 2003 [1,2]. Patient attrition and losses to follow-up, however, have emerged as legitimate threats to the long-term success of these programs. A systematic review of sub-Saharan African cohorts reported lost to follow-up (LTFU) rates as high as 35% in the 3 y following ART initiation [3,4], a finding supported by other regional reports [5–7].

Although commonly described in the context of ART programs, the accurate categorization of a patient as either active or LTFU presents unique challenges. An inherent risk to interval-based definitions for LTFU is misclassification, since a patient who is late for a clinic appointment may elect to return even after the window has elapsed. An interval that is close to the visit date, for example, may be highly sensitive (i.e., a high proportion of patients are accurately identified as LTFU), but specificity will be low. Conversely, an interval that is long will be highly specific (i.e., a high proportion of patients are accurately classified as active), but sensitivity may be limited.

We developed a methodology to empirically determine the optimal operational definition for LTFU [8]. Applied to a cohort of 33,704 ART patients in Lusaka, Zambia [9,10], we found that a threshold of  $\geq 56$  d since last missed visit led to the fewest misclassifications of a patient's status as active or LTFU (5.1%, 95% confidence interval [CI]: 4.8%–5.3%). The primary limitation of our analysis, however, was its external validity. Because participating facilities in Lusaka shared many characteristics (e.g., urban locale, free care, active contact tracing program), their definition for LTFU might not be appropriate for other populations. In this report, we apply this methodology to 111 health facilities across three continents and generate an evidence-based LTFU definition for ART program evaluation worldwide.

## Methods

To empirically determine the best-performing definition for LTFU among adults (i.e.,  $>16$  y at ART initiation) on ART, we analyzed data from six of the seven regions of the International Epidemiologic Databases to Evaluate AIDS (IeDEA) Collaboration: Central Africa, Eastern Africa, Southern Africa, Western Africa, Asia/Pacific, and Latin America/Caribbean. Across these regions, HIV programs from 41 countries contribute unlinked and anonymous individual-level data to the IeDEA initiative [11]. Use of these observational data has been approved by ethics committees and/or institutional review boards in host countries, as well as through those of international partners. Data for each of the regions are updated at least annually and managed by RTI International (Central Africa), Indiana University (Eastern Africa), University of Bern and University of Cape Town (Southern Africa), University of Bordeaux (Western Africa), University of New South Wales (Asia/Pacific), and Vanderbilt University (Latin America/Caribbean).

Because many programs do not routinely collect information regarding the date of next clinic visit, a “days late” definition for LTFU—as used in our Lusaka cohort [8]—may be challenging to implement globally. For that reason, we sought an optimal LTFU definition based on the number of days since last clinic encounter. Our unit of interest was at the level of the health care facility, also described as “health centers” in this report. To ensure adequate patient follow-up time, we included only health centers with a

minimum of 200 adults on ART for at least 6 mo at the date of status classification. Those with patient volumes below this threshold demonstrated high variability in point estimates. Facilities with systematic inconsistencies in data collection (e.g., only a single documented visit for every patient) were also excluded.

For each participating facility, we determined the best-performing definition for LTFU according to the number of days since last patient encounter. Our methodology has been described in detail elsewhere [8]. Briefly, at a set “status classification” date, all patients receiving ART at a given facility are categorized as either active or LTFU based on thresholds of 1 d to 700 d. In our previous work, we set a single status classification date (e.g., 31 December 2007) to be used across all facilities [8]. Because of the larger number of facilities incorporated into this analysis—and the great variation in their time of implementation and their dates of data export—status classification was set either at 12 mo prior to the date of a facility's last data export or 12 mo prior to the last date where data entry appeared complete.

For each threshold interval, we calculated the proportion of individuals misclassified as either “false positive” ( $1 - \text{specificity}$ ) or “false negative” ( $1 - \text{sensitivity}$ ) by comparing status at the classification date and status in the ensuing 12 mo. An individual who was classified as having been lost who returned to care in the ensuing 12 mo would constitute a false-positive misclassification. On the other hand, an individual who was not classified as LTFU but never returned by 12 mo would constitute a false-negative misclassification. The threshold that minimized the combined false-positive and false-negative misclassification was considered the best-performing definition for LTFU. If two or more thresholds resulted in the same misclassification, the one with shortest duration was designated as the more efficient definition.

CIs were constructed for the best-performing LTFU thresholds using a bootstrap approach. Using simple case resampling, 1,000 separate bootstrap samples were generated, and the best-performing LTFU threshold was determined for each. The percentile method was used against the resulting distributions to construct 95% CIs. In our primary analysis, we pooled data from all facilities to arrive at a standard LTFU definition. We determined the resulting differences in misclassification when this overall definition was applied at each facility.

There are currently no “gold standard” methodologies for calculating a summary LTFU measure from individual facility data. Recognizing the limitation of our pooled approach, we thus conducted two secondary analyses. For the first, facilities were weighted equally to determine a cohort summary measure, cohorts were weighted equally to determine a regional summary measure, and regions were weighted equally to arrive at an overall LTFU definition. Means were used to describe the summary LTFU definition at each step. In the second approach, we computed a weighted average of facility-specific LTFU thresholds within each IeDEA region, using the inverse of the variance of the LTFU threshold estimate from the corresponding bootstrap distribution. We then averaged these best-performing regional LTFU definitions to arrive at a summary measure. We sought to determine the robustness of our primary analysis by comparing its results to the results of these alternative approaches.

We performed stratified analyses to determine the potential impact of program characteristics on the best-performing LTFU definition. Using programmatic data gathered through the IeDEA Site Assessment Tool (10 June 2009 version)—and verification by IeDEA regional data managers and facility representatives—we

described each facility according to seven key characteristics: setting (i.e., urban or rural), facility type (i.e., private or public), level of care (i.e., clinic or hospital), presence of a program to follow up missed visits (including contact tracing, telephone reminders, and/or letters), provision of free ART, availability of food supplementation, and provision of family-centered care. Facilities with partial coverage of these program services—whether for targeted populations or for only a segment of the observation period—were categorized as having those characteristics. For facilities with each characteristic, a pooled approach was used to determine the best-performing LTFU threshold and its corresponding 95% CI, the latter derived from the bootstrap sampling described previously. The relationship between optimal LTFU definition and patient volume was also described using a linear regression model.

We applied the overall LTFU definition—as described by our primary analysis—to each participating health center. The overall proportion of adults classified as LTFU was calculated for each facility, with 95% CIs determined by the exact binominal method. All analyses were performed with SAS version 9.13 (SAS Institute).

## Results

Across the six leDEA regions, observational data were available from 510 facilities routinely providing ART to adults. Of these health care centers, 132 had sufficient patient volume to be included in our analysis (i.e.,  $\geq 200$  adults on ART for at least 6 mo at time of status classification). Of these 132 facilities, 21 (16%) were excluded because of gaps in data collection and/or observed inconsistencies within the patient-level medical information.

Among the 111 facilities included in our final analysis, five were located in the Central African region (Democratic Republic of the Congo), 16 in the Eastern African region (Kenya, Tanzania, and Uganda), 72 in the Southern Africa region (Botswana, Malawi, South Africa, Zambia, and Zimbabwe), ten in the Western African region (Benin, Côte d'Ivoire, Nigeria, and Senegal), six in the Asia/Pacific region (India, Malaysia, Taiwan, and Thailand), and two in the Latin America/Caribbean region (Honduras and Mexico). Data from a total of 180,718 HIV-infected adults on ART were included. Regional characteristics—including the number of patients—are shown in Table 1, while individual facility features are available in Table S1.

**Table 1.** Characteristics of participating facilities by leDEA region.

| Characteristic                              | Central African Region           | Eastern African Region  | Southern African Region                          | Western African Region                 | Asia/Pacific Region               | Latin America/Caribbean Region |
|---------------------------------------------|----------------------------------|-------------------------|--------------------------------------------------|----------------------------------------|-----------------------------------|--------------------------------|
| <b>Number of countries</b>                  | 1                                | 3                       | 5                                                | 4                                      | 4                                 | 2                              |
| <b>Countries represented</b>                | Democratic Republic of the Congo | Kenya, Tanzania, Uganda | Botswana, Malawi, South Africa, Zambia, Zimbabwe | Benin, Côte d'Ivoire, Nigeria, Senegal | India, Malaysia, Taiwan, Thailand | Honduras, Mexico               |
| <b>Number of facilities</b>                 | 5                                | 16                      | 72                                               | 10                                     | 6                                 | 2                              |
| <b>Patients included in analysis</b>        | 3,228                            | 21,945                  | 132,586                                          | 20,708                                 | 1,651                             | 600                            |
| <b>Setting</b>                              |                                  |                         |                                                  |                                        |                                   |                                |
| Urban                                       | 5 (100%)                         | 15 (94%)                | 61 (85%)                                         | 10 (100%)                              | 6 (100%)                          | 2 (100%)                       |
| Rural                                       | 0 (0%)                           | 1 (6%)                  | 11 (15%)                                         | 0 (0%)                                 | 0 (0%)                            | 0 (0%)                         |
| <b>Facility type</b>                        |                                  |                         |                                                  |                                        |                                   |                                |
| Public                                      | 0 (0%)                           | 16 (100%)               | 51 (71%)                                         | 8 (80%)                                | 5 (83%)                           | 2 (100%)                       |
| Private                                     | 5 (100%)                         | 0 (0%)                  | 21 (29%)                                         | 2 (20%)                                | 1 (17%)                           | 0 (0%)                         |
| <b>Level of care</b>                        |                                  |                         |                                                  |                                        |                                   |                                |
| Clinic                                      | 5 (100%)                         | 4 (25%)                 | 45 (63%)                                         | 7 (70%)                                | 0 (0%)                            | 0 (0%)                         |
| Hospital                                    | 0 (0%)                           | 12 (75%)                | 27 (38%)                                         | 3 (30%)                                | 6 (100%)                          | 2 (100%)                       |
| <b>Presence of active follow-up program</b> |                                  |                         |                                                  |                                        |                                   |                                |
| Yes                                         | 5 (100%)                         | 15 (94%)                | 51 (71%)                                         | 8 (80%)                                | 6 (100%)                          | 1 (50%)                        |
| No                                          | 0 (0%)                           | 1 (6%)                  | 21 (29%)                                         | 2 (20%)                                | 0 (0%)                            | 1 (50%)                        |
| <b>Provision of free ART</b>                |                                  |                         |                                                  |                                        |                                   |                                |
| Yes                                         | 5 (100%)                         | 14 (88%)                | 71 (99%)                                         | 9 (90%)                                | 2 (33%)                           | 2 (100%)                       |
| No                                          | 0 (0%)                           | 2 (12%)                 | 1 (1%)                                           | 1 (10%)                                | 4 (67%)                           | 0 (0%)                         |
| <b>Food supplementation available</b>       |                                  |                         |                                                  |                                        |                                   |                                |
| Yes                                         | 2 (40%)                          | 13 (81%)                | 27 (38%)                                         | 5 (50%)                                | 1 (17%)                           | 1 (50%)                        |
| No                                          | 3 (60%)                          | 3 (19%)                 | 45 (62%)                                         | 5 (50%)                                | 5 (83%)                           | 1 (50%)                        |
| <b>Family-centered care provided</b>        |                                  |                         |                                                  |                                        |                                   |                                |
| Yes                                         | 5 (100%)                         | 13 (81%)                | 2 (3%)                                           | 7 (70%)                                | 5 (83%)                           | 2 (100%)                       |
| No                                          | 0 (0%)                           | 3 (19%)                 | 70 (97%)                                         | 3 (30%)                                | 1 (17%)                           | 0 (0%)                         |

doi:10.1371/journal.pmed.1001111.t001

In our primary analysis, the best LTFU definition across all health centers was 180 d (95% CI: 173–181 d) since last visit (Figure 1A and 1B). At this threshold, sensitivity was 77.6% (95% CI: 77.3%–78.0%), specificity was 97.1% (95% CI: 97.0%–97.2%), positive predictive value was 89.9% (95% CI: 89.6%–90.2%), and negative predictive value was 93.0% (95% CI: 92.8%–93.1%). Misclassification was at its lowest at this threshold, at 7.7% (95% CI: 7.6%–7.8%). A secondary analysis that gave equal weighting to cohorts and to regions produced an optimal LTFU definition that approximated that of our primary analysis: using this approach, 175 d was found the best-performing threshold. When we weighted facilities in each region according to the inverse of the variance for each optimal LTFU definition, the best-performing threshold was 150 d.

For each facility, we conducted analyses to empirically determine the LTFU threshold that resulted in the fewest misclassifications. Results are shown in Figure 2. The range for these facility-specific LTFU definitions ranged from 58 d to 383 d since last visit, with a mean of 150 d (95% CI: 137–163 d). The lowest misclassification at each facility ranged from 1.2% to 19.0%, with a mean of 7.2% (95% CI: 6.6%–7.8%). When the summary definition of 180 d—as calculated from our primary analysis—was applied to each facility, the observed additional increase in misclassification was between 0% and 5.2%, with a mean difference of 1.2% (95% CI: 1.0%–1.5%; Figure 3). These incremental differences in misclassification were slightly higher when the 175-d definition was applied (mean = 1.3%; 95% CI:

1.1%–1.6%) and when the 150-d definition was used (mean = 1.6%; 95% CI: 1.2%–2.1%).

When we stratified according to different facility-level characteristics, only minor differences were observed in the best-performing definition for setting type or presence of an active follow-up program. Optimal LTFU definitions differed by  $\geq 21$  d when patients were categorized according to facility type (35-d difference), level of care (30-d difference), provision of free ART (21-d difference), and provision of family-centered care (31-d difference). The corresponding differences in misclassification, however, were small and not believed to be practically meaningful (Table 2). When we examined the relationship between patient volume and best-performing LTFU definitions, smaller facilities appeared to have longer optimal thresholds when compared to health centers with higher enrollments (Figure 4).

Overall, 38,615 of 180,718 (21.4%) patients were classified as LTFU at the time of status classification based on a definition of 180 d since last visit. At this threshold, the proportion of adults on ART that would be classified as LTFU ranged from 3.1% to 45.1% (mean = 19.9%; 95% CI: 18.1%–21.7%; Figure 5).

## Discussion

The objective of this analysis was to empirically determine a standard LTFU definition that could be used across ART programs worldwide. To achieve this aim, we used a methodology that minimized the inaccurate categorization of patients as either active or LTFU. In a pooled analysis of 111 facilities, a definition of 180 d for LTFU resulted in the fewest patients misclassified, a finding generally supported by our other summary approaches.

At present, there is a great deal of variability in LTFU definitions used across different settings: a standard definition for LTFU may be valuable in a number of different contexts [12]. In the area of monitoring and evaluation of ART programs, for example, managers could use a universal definition to compare program performance between facilities and/or cohorts. Such an approach would help to identify “best practices” associated with low LTFU rates, while providing the necessary framework for ongoing evaluation and quality improvement. In the area of health systems research, an empirically determined LTFU definition could provide much needed standardization to the outcome measures of clinical trials and epidemiologic studies. In contrast, a universal definition of LTFU—as proposed in this analysis—might have a more limited role for patient management. Our best-performing definition is based on the accurate categorization of individuals as active or LTFU; it is not designed to identify the optimal timing for retention activities such as patient recall or contact tracing.

We encountered methodological challenges in determining our summary LTFU definition. An analytic approach that pooled all data would take full advantage of the substantial resources available through the IeDEA Collaboration; however, larger facilities, cohorts, and/or regions might be overrepresented in the final result. An analytical approach that provided more balanced weighting across the different levels (e.g., cohorts and regions), on the other hand, would reduce the influence of the largest facilities at risk of overemphasizing the role of smaller cohorts or regions. To address this important issue, we conducted three separate analyses, each taking into account these different strengths and limitations. Two of these yielded similar results: 180 d as the best LTFU definition when all data were pooled and 175 d when cohorts and regions were given equal weighting. The third approach, which provided weighting inverse to the variance from each facility’s bootstrap simulations, resulted in an optimal LTFU

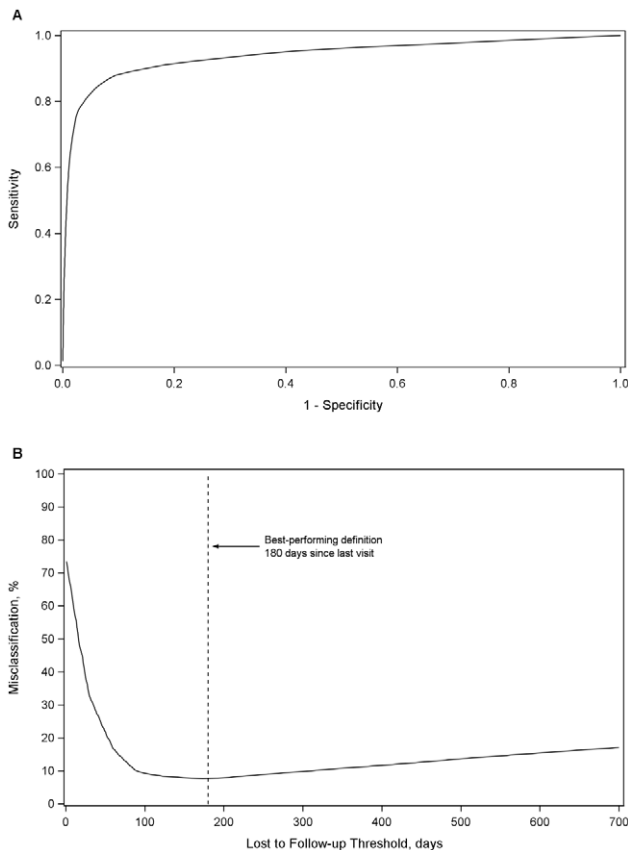

**Figure 1. Best-performing definition for loss to follow-up.** Demonstrated by receiver-operator curves (A) and misclassification (B) in the primary pooled analysis. doi:10.1371/journal.pmed.1001111.g001

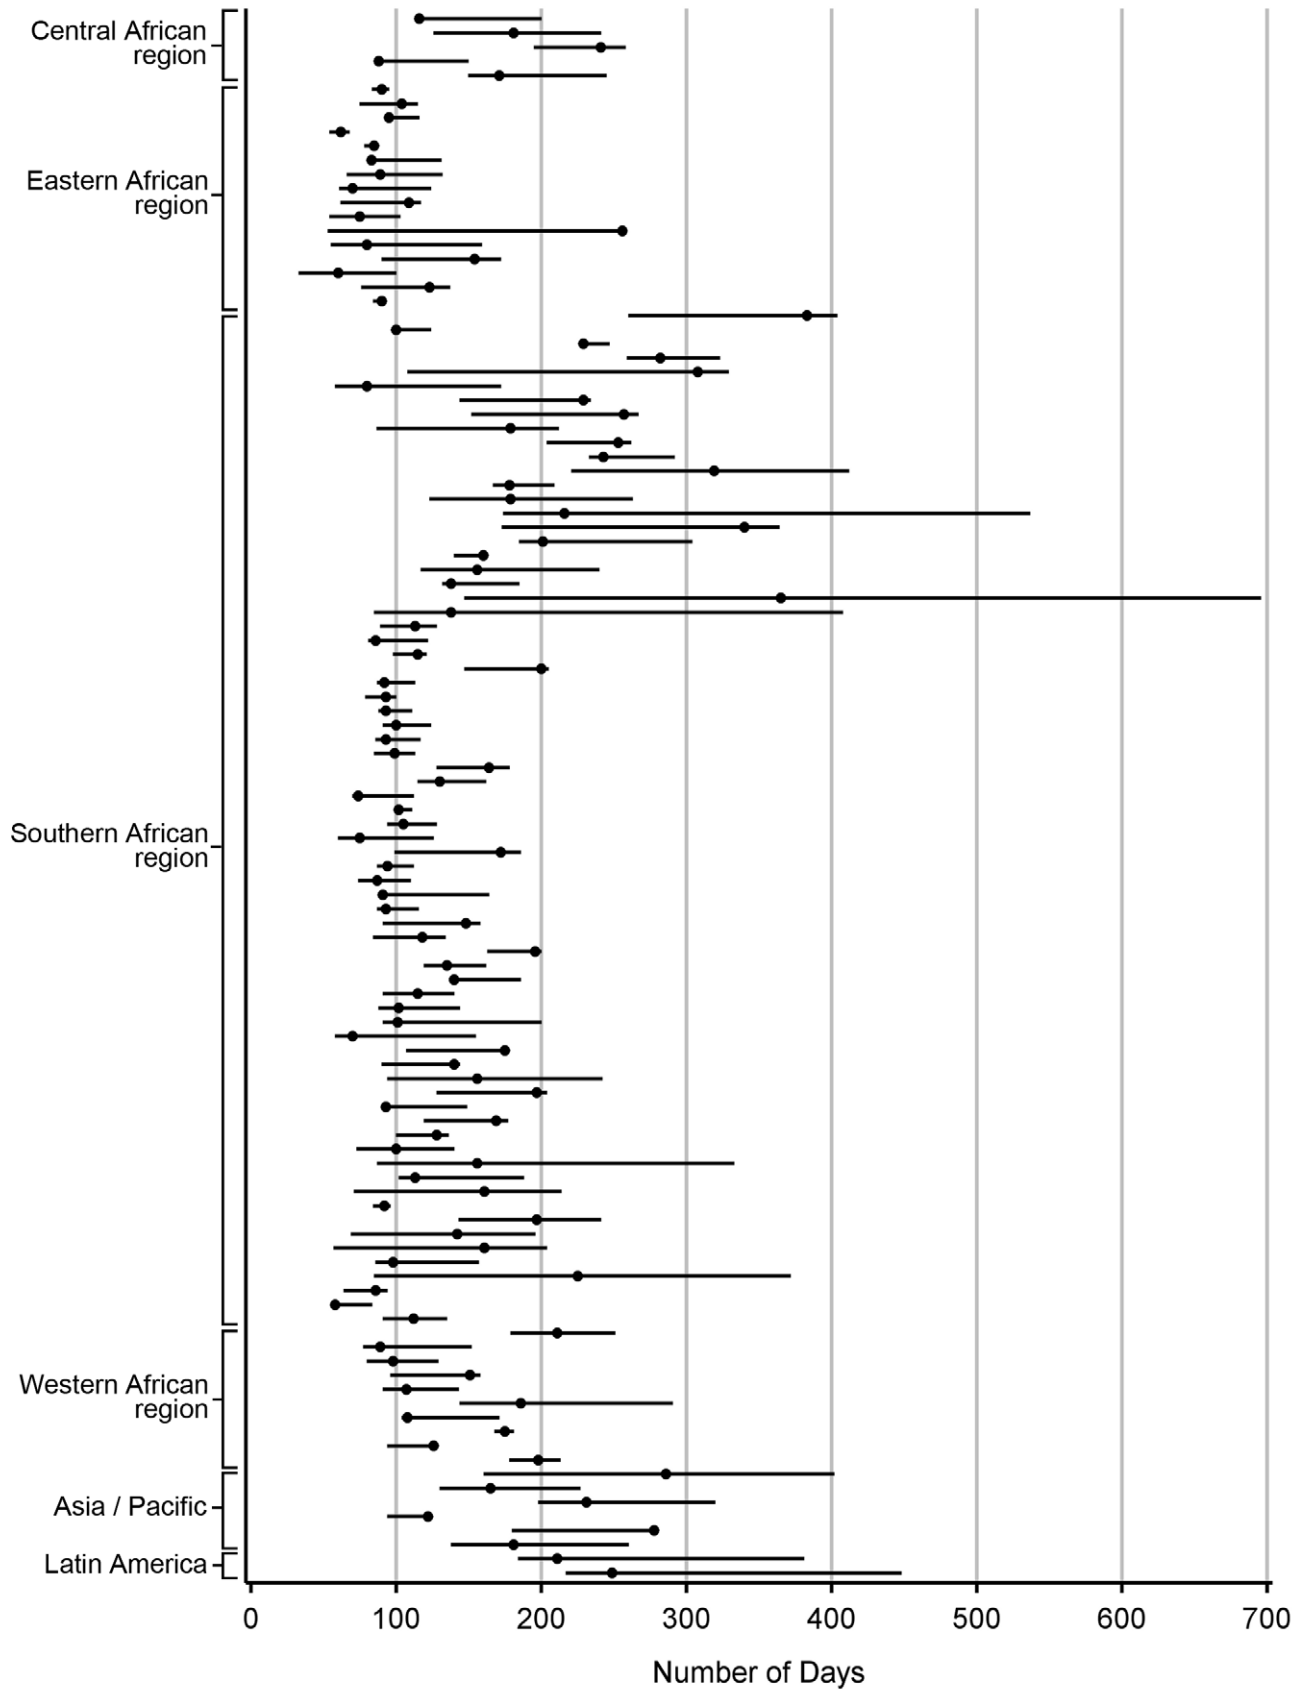

**Figure 2. Best-performing definition of loss to follow-up by facility.** Each dot represents one facility. Shown with 95% CIs determined via bootstrap modeling and grouped by leDEA region. doi:10.1371/journal.pmed.1001111.g002

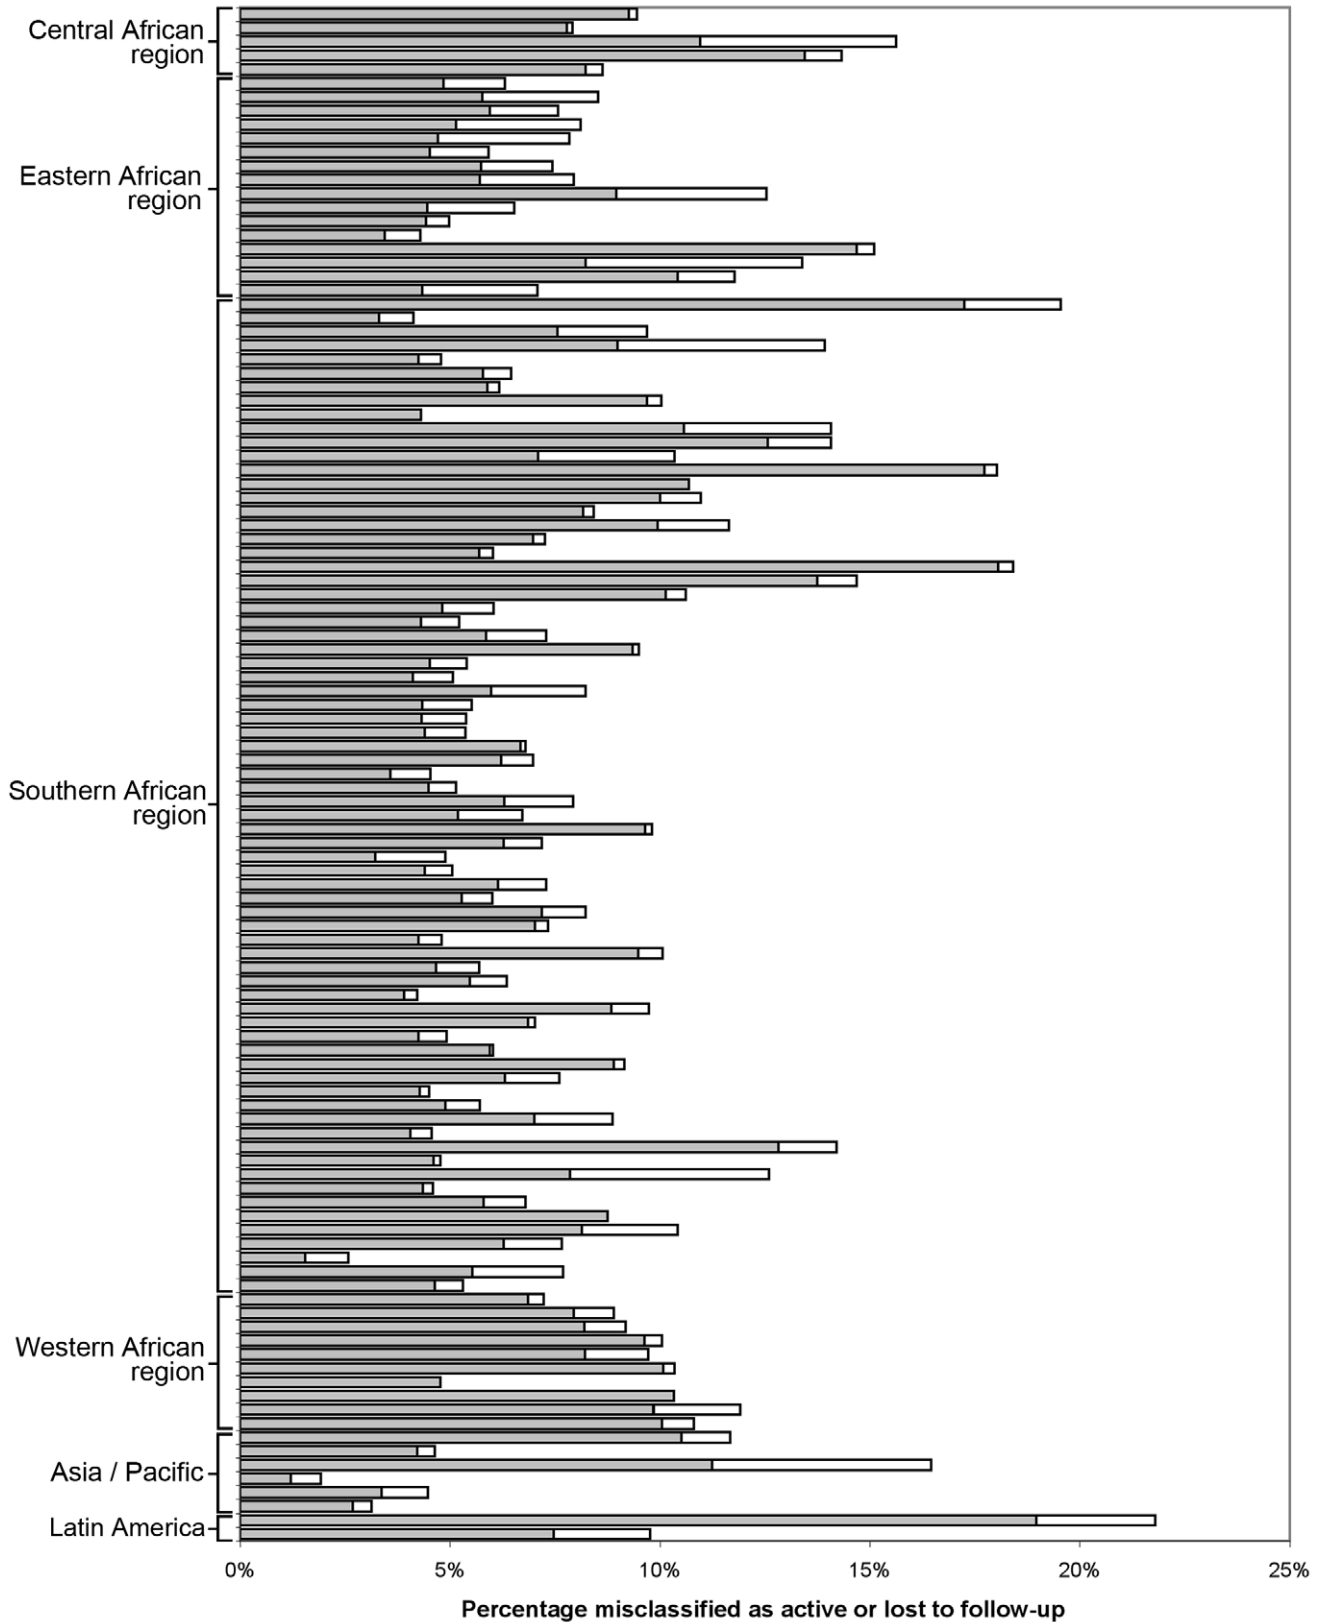

**Figure 3. Percentage misclassified at the best-performing definition for loss to follow-up across 111 facilities, grouped by leDEA region.** The shaded portion of each bar represents the misclassification associated with each facility's best-performing LTFU definition. The white segment shows the incremental increase in misclassification when the proposed standard definition of 180 d was applied to the health center's patient population.  
doi:10.1371/journal.pmed.1001111.g003

**Table 2.** Best-performing definition for loss to follow-up when patient populations are stratified according to the different characteristics of facilities at which they seek care.

| Facility Characteristic                           | Number of Facilities | Number of Patients | Best-Performing Definition, Days | Misclassification (95% CI) |
|---------------------------------------------------|----------------------|--------------------|----------------------------------|----------------------------|
| <b>Setting</b>                                    |                      |                    |                                  |                            |
| Rural                                             | 12/111 (11%)         | 8,635              | 175                              | 6.9% (6.4%–7.5%)           |
| Urban                                             | 99/111 (89%)         | 172,083            | 180                              | 7.7% (7.6%–7.9%)           |
| <b>Facility type</b>                              |                      |                    |                                  |                            |
| Public                                            | 81/111 (73%)         | 154,618            | 173                              | 7.3% (7.2%–7.5%)           |
| Private                                           | 30/111 (27%)         | 26,100             | 208                              | 9.6% (9.2%–9.9%)           |
| <b>Level of care</b>                              |                      |                    |                                  |                            |
| Clinic                                            | 57/111 (51%)         | 84,298             | 150                              | 6.8% (6.6%–6.9%)           |
| Hospital                                          | 54/111 (49%)         | 96,420             | 180                              | 8.6% (8.4%–8.8%)           |
| <b>Presence of active follow-up program</b>       |                      |                    |                                  |                            |
| Yes                                               | 86/111 (77%)         | 151,931            | 180                              | 7.5% (7.3%–7.6%)           |
| No                                                | 25/111 (23%)         | 28,787             | 175                              | 8.9% (8.6%–9.3%)           |
| <b>Provision of free ART</b>                      |                      |                    |                                  |                            |
| Yes                                               | 103/111 (93%)        | 174,216            | 180                              | 7.6% (7.4%–7.7%)           |
| No                                                | 8/111 (7%)           | 6,502              | 159                              | 10.8% (10.1%–11.6%)        |
| <b>Food supplementation available<sup>a</sup></b> |                      |                    |                                  |                            |
| Yes                                               | 49/111 (44%)         | 100,946            | 180                              | 7.0% (6.9%–7.2%)           |
| No                                                | 62/111 (56%)         | 79,772             | 173                              | 8.5% (8.3%–8.7%)           |
| <b>Family-centered care provided</b>              |                      |                    |                                  |                            |
| Yes                                               | 34/111 (32%)         | 37,294             | 150                              | 8.9% (8.7%–9.2%)           |
| No                                                | 77/111 (68%)         | 143,424            | 181                              | 7.3% (7.2%–7.5%)           |

<sup>a</sup>Available to at least a subset of patients at the facility.  
doi:10.1371/journal.pmed.1001111.t002

definition that was slightly shorter in duration (i.e., 150 d since last visit). Since large health centers exhibited the smallest variances in our analysis—and since facilities with the largest patient volumes had the shortest optimal LTFU thresholds (Figure 4)—this finding was not surprising. Because of the small difference in number of misclassifications noted between this result and that of our primary analysis (+0.2%), however, we recommend use of the  $\geq 180$ -d threshold for defining LTFU.

Many ART programs have used a 6-mo absence from the health care facility to define LTFU [13–15], a practice supported by our analysis. Because there is no standard definition among ART programs, other thresholds have also been frequently considered. In Kenya's AMPATH (Academic Model Providing Access to Healthcare) cohort, for example, patients are categorized as LTFU if more than 3 mo have elapsed since the last clinic encounter [16,17]. Compared to our proposed 180-d LTFU definition, such a 90-d threshold would result in only a 2.3% increase in misclassification (10.0% versus 7.7%) but a 7.3% (28.7% versus 21.4%) increase among those categorized as LTFU. If a 365-d definition for LTFU had been used—as done previously by ART-LINC, ART-CC, and IeDEA investigators [18–20]—misclassification would increase by 3.3% (11.0% versus 7.7%), while the proportion categorized as LTFU would decrease by 6.1% (15.3% versus 21.4%). Such differences in reported patient attrition could have an important impact on program evaluations and cohort analyses.

Our current analysis represents a substantial extension of a methodology previously applied to the large, well-characterized Lusaka ART cohort [8]. We included data from 111 health

centers across three continents, increasing the external validity of our findings. We calculated the best-performing LTFU definitions for each of these facilities, demonstrating the differences that may exist even when health centers share multiple program characteristics. We also measured LTFU by the days since last visit, a metric that is more likely to be useful across programs. A LTFU definition based on “lateness” to the next scheduled clinic visit would undoubtedly have greater precision, but most electronic medical records do not routinely provide information on the next scheduled visit. Where possible, we suggest that the date of next clinical visit be included in standard program registration and reporting, particularly given its clear and important role in coordinating outreach for defaulters.

We recognize that our approach for establishing a universal definition for LTFU may overlook intricacies inherent to specific clinics and to specific patients. Appointment schedules, for example, may change over the course of treatment and may vary between health care facilities. The capacity to account for transfers between facilities may also differ, depending on the availability and sophistication of, and linkages between, electronic medical records. However, we view this “real world” perspective as a strength of our approach, particularly given the large number of clinics included in the analysis. Our final summary measure may appear imperfect for any one health center, but performance is markedly improved in the context of multiple different settings.

When our proposed universal LTFU definition (i.e., 180 d) was applied to each facility, we observed only small increases in misclassification, even when the individual health center's best-

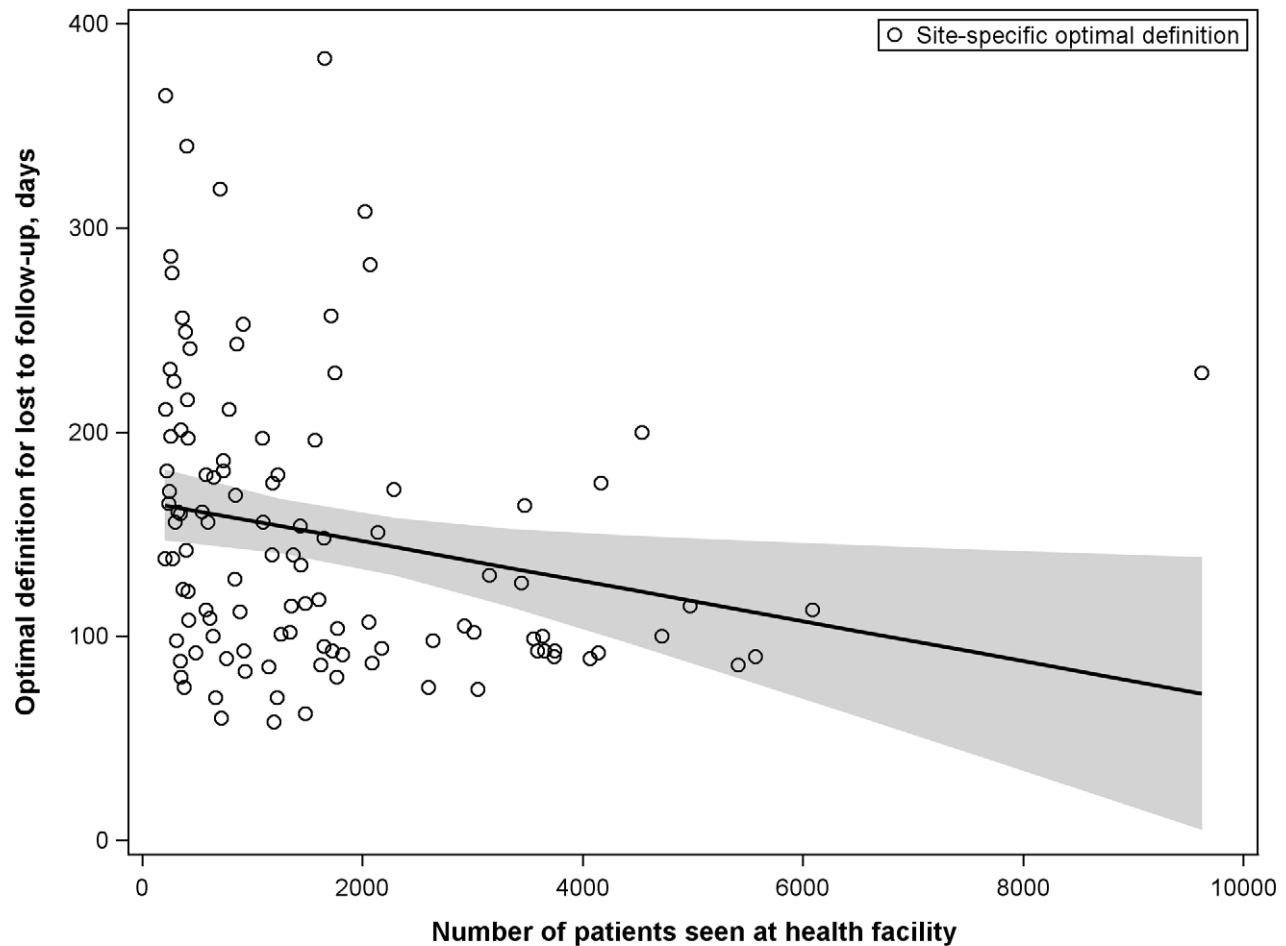

**Figure 4. Association between patient volume and optimal definition for loss to follow-up across 111 participating facilities.** The line represents the results of a linear regression model, while the shaded portion represents its 95% CI.  
doi:10.1371/journal.pmed.1001111.g004

performing definition was far from 180 d. This finding can be explained by the shape of the misclassification curve (Figure 1B). When facility-specific misclassification curves were reviewed, the same general trend emerged. As the window for LTFU classification was extended, there was an initial rapid decline in misclassification, which dropped to a nadir and then gradually rose over the subsequent 200 to 300 d. This provided an extended period across which only small incremental differences are observed in misclassification.

The more accurate the categorization of active or LTFU is at the time of status classification, the shorter the optimal LTFU definition for that specific facility. When many patients returned to care after extended periods, a longer LTFU threshold was needed to minimize misclassification [8]. These trends may help to explain some of the differences observed among facilities. Characteristics thought to improve patient retention (e.g., free ART, food supplementation, and active follow-up after missed visits) were generally associated with optimal LTFU definitions that were longer (Table 2), suggesting that patients often returned to care even after a significant period had elapsed since their last clinic visit. The exception was family-centered care, where facilities that incorporated such recruitment strategies had shorter optimal LTFU definitions (150 d, versus 181 d for facilities that did not have family-centered care).

Interestingly, patient volume was inversely associated with the length of the health facility's best-performing LTFU threshold. Specifically, health care centers with larger patient volumes appeared to have shorter optimal LTFU definitions. The increased waiting times typically associated with such crowded and overburdened settings likely serve as an important obstacle for retention; as a result, those on ART more quickly distinguish themselves as either active or LTFU.

We note several limitations to this analysis. First, while we advocate for establishment of a universal LTFU threshold, we recognize the marked heterogeneity in best-performing definitions among participating facilities (Figure 2). While we were reassured by the marginal differences in misclassification when the 180-d threshold was applied, it is possible that—in certain contexts—local, national, or regional definitions may be more appropriate for program evaluation. In these situations, the methodology described in this report can be used to determine specific LTFU thresholds for the populations of interest. Second, we did not include HIV-infected patients who sought care but were not yet eligible for treatment, a population that has been shown to have high rates of attrition [21,22]. Optimal LTFU definitions for the “pre-ART” population are likely longer than for those initiating ART and should be explored further. Third, we observed instability in our point estimates when this methodology was



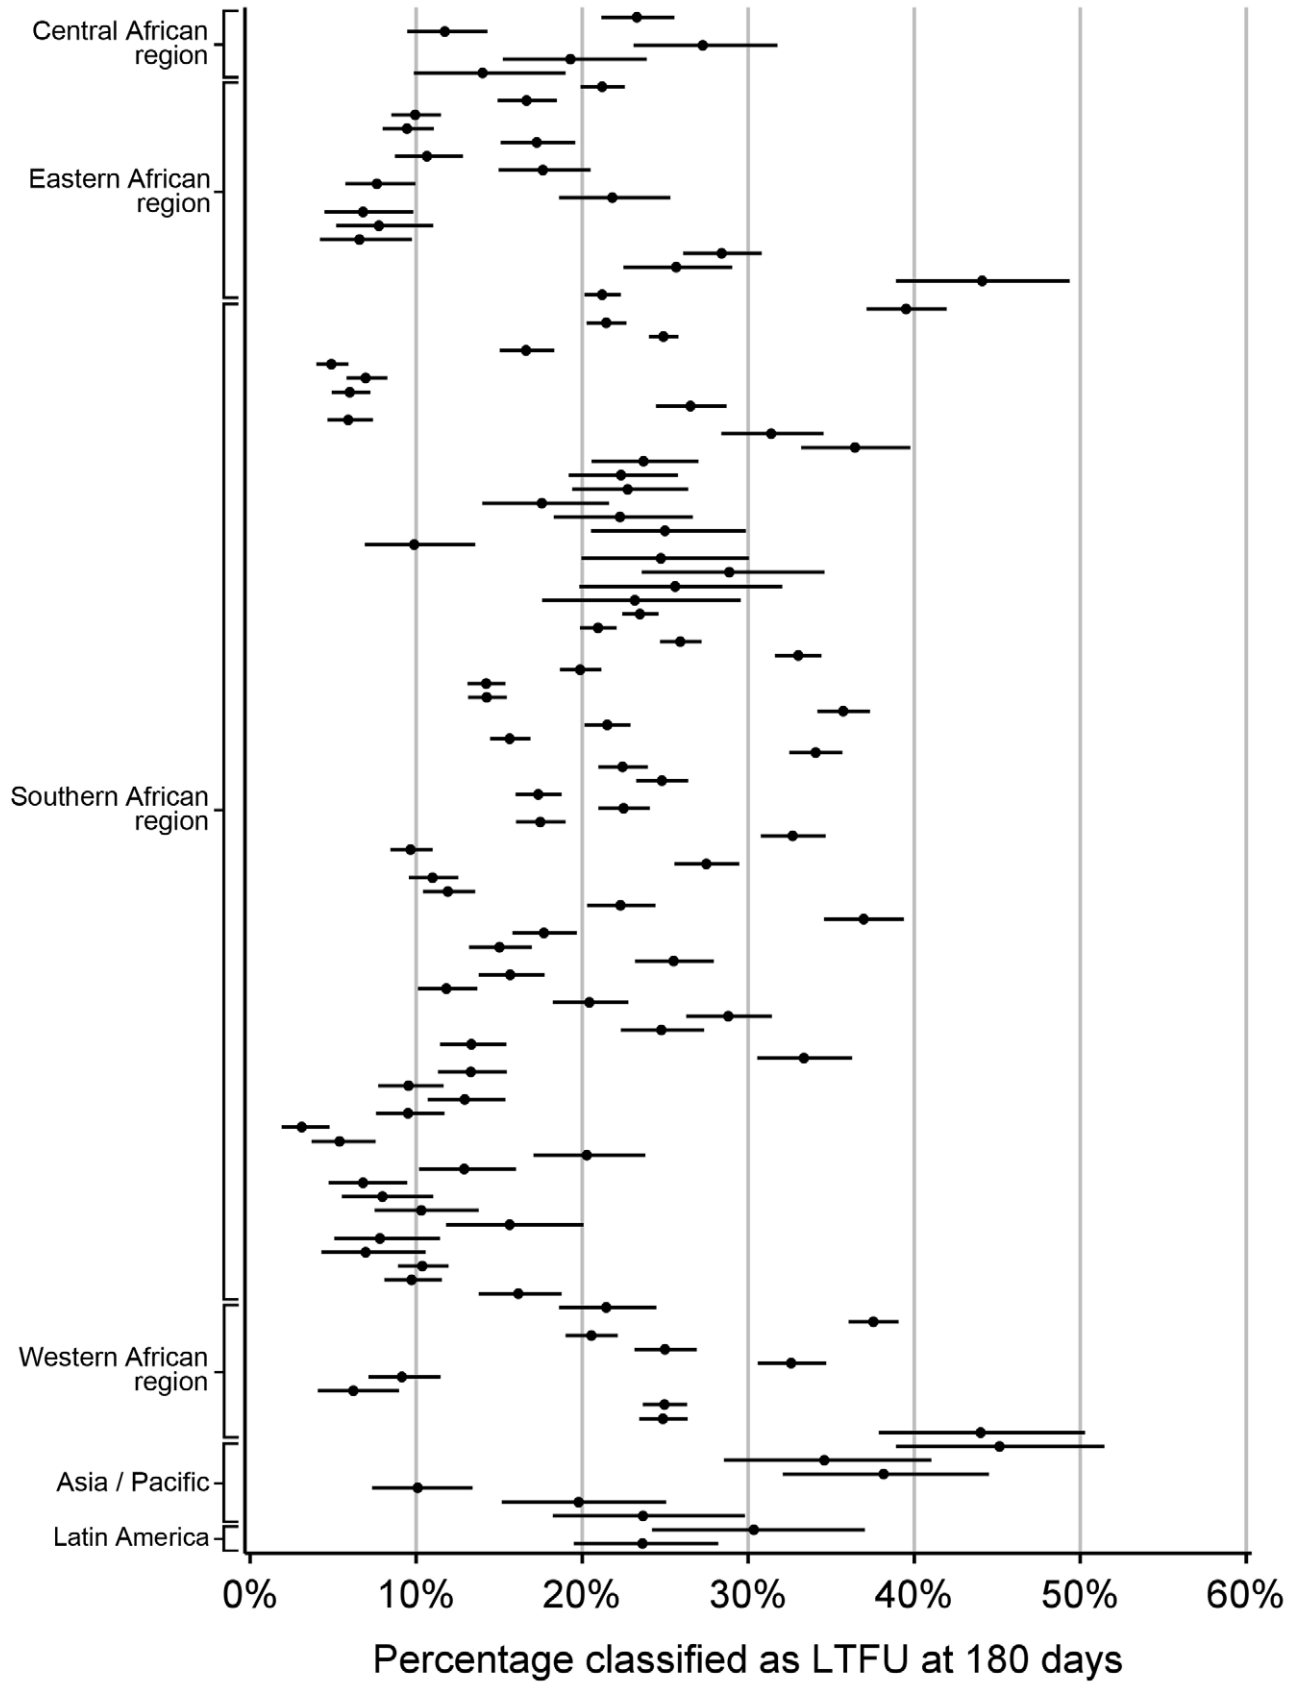

**Figure 5. Percentage of patients classified as lost to follow-up at each of 111 participating facilities based on the proposed standard definition of 180 d since last visit, grouped by leDEA region.**  
 doi:10.1371/journal.pmed.1001111.g005

applied to clinics with smaller volumes and/or incomplete data collection. As a result, we were unable to use data from many smaller facilities contributing data to the IeDEA Collaboration. That we were able to include the vast majority (84%) of health facilities meeting our eligibility criteria does, however, provide some confidence as to the external validity of our findings. Fourth, African facilities were heavily represented since these are the regions where program expansion has been most rapid. When the final summary definition was applied to the Asian and Latin American facilities in our study, there was a relatively low difference in misclassification ( $\leq 5\%$ ), suggesting that our findings are robust and applicable to programs outside of sub-Saharan Africa. Fifth, standardization of LTFU definitions represents only the first step in improving patient retention. Further research is needed to understand individual- and facility-level predictors of LTFU, so that at-risk populations can be identified and appropriate interventions can be evaluated [12].

A universal LTFU definition for ART program monitoring is clearly needed, but how would such standardization be best achieved? Because of the wide range of LTFU thresholds already in use [3], we advocate a top-down approach. Consensus for key monitoring and evaluation parameters (including LTFU) should first be established, based on input from program managers, policymakers, and program funders. In these deliberations, a broad range of criteria must be applied. Although we focus on the proper classification of patient status in this analysis—and believe it to be critical—other factors (e.g., clinical care implications and infrastructural demands) deserve consideration as well. Once established, buy-in from local governments and funders will be needed so that these consensus definitions are incorporated into routine program reporting. In some settings, implementation will require only minor adjustments to existing registers, electronic medical records, and data reporting systems (e.g., national-level health management information systems). The United States President's Emergency Plan for AIDS Relief, for example, already has standard reporting requirements [23] and similar measures have been adopted by local governments as well [24]. In other contexts, investment may be needed, both in terms of equipment and human resources, to ensure that such information is captured in a proper and timely fashion. Finally, such standardization will be useful only if data are routinely collected and reviewed. Ongoing monitoring is needed to ensure that feedback loops back to facilities are intact.

In conclusion, based on this large evaluation of 111 health facilities, we recommend a threshold of 180 d since the last clinic visit as a standard definition for LTFU. Harmonization of monitoring and evaluation activities in this manner is an important step towards understanding the phenomenon of patient attrition within and between cohorts worldwide. Standardization is also crucial to the development and comprehensive implementation of methodology correcting for bias in measures of program effectiveness, including assessment of mortality [25–27] and estimation of major disease markers such as CD4 counts. Finally, it provides the necessary framework for continued research to improve patient retention [28–30], so that the health gains from HIV treatment programs may be maximized and sustained.

## Supporting Information

**Table S1 Characteristics of the 111 health facilities included in this analysis.**  
(PDF)

## Acknowledgments

We acknowledge team members from each of the participating health facilities and coordinating centers for their roles in data collection, data management, and administrative coordination. **Asia/Pacific region:** N. Kumarasamy, S. Saghayam, C. Ezhilarasi (YRG Centre for AIDS Research and Education, India); C. K.-C. Lee, B. H.-L. Sim, R. David (Hospital Sungai Buloh, Malaysia); Y. M. A. Chen, W. W. Wong, L. H. Kuo (National Yang-Ming University, Taiwan); P. Phanuphak, K. Ruxrungtham, M. Khongphattayanoythin (HIV-NAT/Thai Red Cross AIDS Research Centre, Thailand); S. Kiertburanakul, S. Sungkanuparph, N. Sanmeema (Ramathibodi Hospital, Mahidol University, Thailand); R. Chaiwarith, W. Kotarathitum (Research Institute for Health Sciences, Thailand); A. H. Sohn, L. Messerschmidt, B. Petersen (TREAT Asia, amfAR—The Foundation for AIDS Research, Thailand); D. A. Cooper, M. G. Law, J. Zhou, A. Jiamsakul (The Kirby Institute, University of New South Wales, Australia). **Latin America/Caribbean region:** Y. N. Caro-Vega, B. Crabtree-Ramirez, J. G. Sierra-Madero (El Instituto Nacional de Ciencias Médicas y Nutrición Salvador Zubirán, Mexico); D. Padgett, R. M. Gonzales Romero, G. Saldgado-Zelaya (Instituto Hondureño de Seguridad Social and Hospital de Especialidades, Honduras); J. Wrenn, B. Shepherd, D. Masys, C. McGowan (Vanderbilt University, US). **Central Africa region:** L. Kalenga, M. Mbaya, (Amo-Congo, Democratic Republic of the Congo); J. Atibu, M. Kiumbu (IeDEA Central Africa Regional Office, Democratic Republic of the Congo); I. Azinyue (IeDEA Central Africa Regional Office, Cameroon); J. Hemingway-Foday, G. Woelk (RTI International, US). **Eastern Africa region:** L. Diero, E. Sang (Academic Model Providing Access to Healthcare, Kenya); E. Bukusi, C. Cohen (Family AIDS Care and Education Services, Kenya); A. Kambugu, P. Easterbrook (Infectious Disease Institute, Uganda); M. B. Bwana (Mbarara Immune Suppression Syndrome Clinic, Uganda); J. Otieno (Nyaza Provincial Hospital, Kenya); D. Wabwire (MU-JHU Research Collaboration, Uganda); P. Okong (St. Francis Hospital, Uganda); G. Somi, R. Swai (Tanzania National AIDS Control Programme, Tanzania); H. Muro (Ocean Road Cancer Institute, Tanzania); I. Maruchu (Tumbi Regional Hospital, Tanzania); R. Lyamuya (Morogoro Regional Hospital, Tanzania); D. Nash, B. Elul (Columbia University, US); B. S. Musick (Indiana University, US). **Southern Africa region:** D. Dickinson (Gaborone Independent Hospital, Botswana); S. Phiri (Lighthouse Clinic, Malawi); C. Bolton-Moore, R. Cantrell, N. T. Chintu, L. B. Mulenga, E. M. Stringer, J. S. A. Stringer (Centre for Infectious Disease Research in Zambia, Zambia); M. Pascoe (Newlands Clinic, Zimbabwe); K. Pfeiffer, C. Fritz, J. Ehmer (SolidarMed, Zimbabwe); P. MacPhail, M. Maskew (Themba Lethu Clinic, University of the Witwatersrand, South Africa); S. Charalambous, C. J. Hoffmann, G. J. Churchyard (Aurum Institute, South Africa); J. Giddy (McCord Hospital, University of KwaZulu Natal, South Africa); D. Garone, G. van Cutsem (Khayelitsha ART Programme, South Africa); R. Wood (Gugulethu and Masiphumelele ART Programmes, South Africa); H. Prozesky (Tygerberg Academic Hospital, South Africa); A. Boule, M. Cornell, N. Maxwell (University of Cape Town, South Africa); M. Egger, C. Graber, F. Käser (University of Bern, Switzerland). **Western Africa region:** S. Toure (Centre de Prise en Charge, de Recherche et de Formation, Côte d'Ivoire); A. Minga (Centre National de Transfusion Sanguine à Abidjan, Côte d'Ivoire); F. O. Ba-Gomis (Centre Intégré de Recherche Bioclinique d'Abidjan, Côte d'Ivoire); C. Amani-Bosse, P. Toure (MTCT+ Initiative, ACONDA, Côte d'Ivoire); E. Bissagnene, S. P. Eholie (Service des Maladies Infectieuses et Tropicales, Centre Hospitalier Universitaire de Treichville, Côte d'Ivoire); S. Koule (Unité de Soins Ambulatoires et de Conseil, Côte d'Ivoire); M. D. Zannou (Centre de Prise en Charge des personnes vivant avec le VIH due Centre Hospitalier Universitaire, Benin); M. Charurat (Institute of Human Virology, Nigeria); P. Salif Sow (Service des Maladies Infectieuses et Tropicales, Centre Hospitalier Universitaire de Fann, Senegal); D. K. Ekouevi, F. Dabis (Université Bordeaux Segalen, France). **US National Institutes of Health:** C. Williams, M. Bacon, R. Huebner (National Institute of Allergies and Infectious Diseases, US).

## Author Contributions

Conceived and designed the experiments: BHC CTY AOW MWGB RT. Analyzed the data: AOW RT. Wrote the first draft of the manuscript: BHC. Contributed to the writing of the manuscript: BHC CTY AOW JEN JZ CC MWGB AM EB GC TS HM JNM AG MB RT. ICMJE criteria for

authorship read and met: BHC CTY AOW JEN JZ CC MWGB AM EB GC TS HM JNM AG MB RT. Agree with manuscript results and

conclusions: BHC CTY AOW JEN JZ CC MWGB AM EB GC TS HM JNM AG MB RT.

## References

1. Joint United Nations Programme on HIV/AIDS (2009) Towards universal access: scaling up priority HIV/AIDS interventions in the health sector, progress report 2009. Geneva: World Health Organization.
2. World Health Organization (2006) Progress on global access to HIV antiretroviral therapy: a report on "3 by 5" and beyond, March 2006. Geneva: World Health Organization.
3. Rosen S, Fox MP, Gill CJ (2007) Patient retention in antiretroviral therapy programs in sub-Saharan Africa: a systematic review. *PLoS Med* 4: e298. doi:10.1371/journal.pmed.0040298.
4. Fox MP, Rosen S (2010) Patient retention in antiretroviral therapy programs up to three years on treatment in sub-Saharan Africa, 2007–2009: systematic review. *Trop Med Int Health* 15(Suppl 1): 1–15.
5. Ekouevi DK, Balestre E, Ba-Gomis FO, Eholie SP, Maiga M, et al. (2010) Low retention of HIV-infected patients on antiretroviral therapy in 11 clinical centres in West Africa. *Trop Med Int Health* 15(Suppl 1): 34–42.
6. McGowan CC, Cahn P, Gotuzzo E, Padgett D, Pape JW, et al. (2007) Cohort profile: Caribbean, Central and South America Network for HIV research (CCASAnet) collaboration within the International Epidemiologic Databases to Evaluate AIDS (IcDEA) programme. *Int J Epidemiol* 36: 969–976.
7. Dabis F, Balestre E, Braitstein P, Miotti P, Brinkhof WG, et al. (2005) Cohort profile: Antiretroviral Therapy in Lower Income Countries (ART-LINC): international collaboration of treatment cohorts. *Int J Epidemiol* 34: 979–986.
8. Chi BH, Cantrell RA, Mwango A, Westfall AO, Mutale W, et al. (2010) An empirical approach to defining loss to follow-up among patients enrolled in antiretroviral treatment programs. *Am J Epidemiol* 171: 924–931.
9. Stringer JS, Zulu I, Levy J, Stringer EM, Mwango A, et al. (2006) Rapid scale-up of antiretroviral therapy at primary care sites in Zambia: feasibility and early outcomes. *JAMA* 296: 782–793.
10. Bolton-Moore C, Mubiana-Mbwe M, Cantrell RA, Chintu N, Stringer EM, et al. (2007) Clinical outcomes and CD4 cell response in children receiving antiretroviral therapy at primary health care facilities in Zambia. *JAMA* 298: 1888–1899.
11. International Epidemiologic Databases to Evaluate AIDS (2011) Participating regions. International Epidemiologic Databases to Evaluate AIDS. Available: <http://www.icdea.org/regions>. Accessed 23 September 2011.
12. Geng EH, Nash D, Kambugu A, Zhang Y, Braitstein P, et al. (2010) Retention in care among HIV-infected patients in resource-limited settings: emerging insights and new directions. *Curr HIV/AIDS Rep* 7: 234–244.
13. Brinkhof MW, Dabis F, Myer L, Bangsberg DR, Boule A, et al. (2008) Early loss of HIV-infected patients on potent antiretroviral therapy programmes in lower-income countries. *Bull World Health Organ* 86: 559–567.
14. Geng EH, Emenyonu N, Bwana MB, Glidden DV, Martin JN (2008) Sampling-based approach to determining outcomes of patients lost to follow-up in antiretroviral therapy scale-up programs in Africa. *JAMA* 300: 506–507.
15. Cesar C, Shepherd BE, Krolewiecki AJ, Fink VI, Schechter M, et al. (2010) Rates and reasons for early change of first HAART in HIV-1-infected patients in 7 sites throughout the Caribbean and Latin America. *PLoS ONE* 5: e10490. doi:10.1371/journal.pone.0010490.
16. Wools-Kaloustian K, Kimaiyo S, Musick B, Sidle J, Siika A, et al. (2009) The impact of the President's Emergency Plan for AIDS Relief on expansion of HIV care services for adult patients in western Kenya. *AIDS* 23: 195–201.
17. Wools-Kaloustian K, Kimaiyo S, Diero L, Siika A, Sidle J, et al. (2006) Viability and effectiveness of large-scale HIV treatment initiatives in sub-Saharan Africa: experience from western Kenya. *AIDS* 20: 41–48.
18. Braitstein P, Brinkhof MW, Dabis F, Schechter M, Boule A, et al. (2006) Mortality of HIV-1-infected patients in the first year of antiretroviral therapy: comparison between low-income and high-income countries. *Lancet* 367: 817–824.
19. Tuboi SH, Schechter M, McGowan CC, Cesar C, Krolewiecki A, et al. (2009) Mortality during the first year of potent antiretroviral therapy in HIV-1-infected patients in 7 sites throughout Latin America and the Caribbean. *J Acquir Immune Defic Syndr* 51: 615–623.
20. Falster K, Choi JY, Donovan B, Duncombe C, Mulhall B, et al. (2009) AIDS-related and non-AIDS-related mortality in the Asia-Pacific region in the era of combination antiretroviral treatment. *AIDS* 23: 2323–2336.
21. Larson BA, Brennan A, McNamara L, Long L, Rosen S, et al. (2010) Early loss to follow up after enrolment in pre-ART care at a large public clinic in Johannesburg, South Africa. *Trop Med Int Health* 15(Suppl 1): 43–47.
22. McGuire M, Munyenembe T, Szumilin E, Heinzelmann A, Le Paih M, et al. (2010) Vital status of pre-ART and ART patients defaulting from care in rural Malawi. *Trop Med Int Health* 15(Suppl 1): 55–62.
23. Holmes CB, Williams-Sherlock MA, Bouey PD (2009) Monitoring and evaluation of PEPFAR treatment programmes. *Lancet* 374: 1146–1147.
24. Zambian Ministry of Health (2010) Adult and adolescent antiretroviral therapy protocols. Lusaka (Zambia): Printech Press.
25. Brinkhof MW, Pujades-Rodriguez M, Egger M (2009) Mortality of patients lost to follow-up in antiretroviral treatment programmes in resource-limited settings: systematic review and meta-analysis. *PLoS ONE* 4: e5790. doi:10.1371/journal.pone.0005790.
26. Yiannoutsos CT, An MW, Frangakis CE, Musick BS, Braitstein P, et al. (2008) Sampling-based approaches to improve estimation of mortality among patient dropouts: experience from a large PEPFAR-funded program in Western Kenya. *PLoS ONE* 3: e3843. doi:10.1371/journal.pone.0003843.
27. Egger M, Spycher BD, Sidle J, Weigel R, Geng EH, et al. (2011) Correcting mortality for loss to follow-up: a nomogram applied to antiretroviral treatment programmes in sub-saharan Africa. *PLoS Med* 8: e1000390. doi:10.1371/journal.pmed.1000390.
28. Lester RT, Ritvo P, Mills EJ, Kariri A, Karanja S, et al. (2010) Effects of a mobile phone short message service on antiretroviral treatment adherence in Kenya (WeTel Kenya): a randomised trial. *Lancet* 376: 1838–1845.
29. Behforouz HL, Farmer PE, Mukherjee JS (2004) From directly observed therapy to accompagnateurs: enhancing AIDS treatment outcomes in Haiti and in Boston. *Clin Infect Dis* 38(Suppl 5): S429–S436.
30. Krebs DW, Chi BH, Mulenga Y, Morris M, Cantrell RA, et al. (2008) Community-based follow-up for late patients enrolled in a district-wide programme for antiretroviral therapy in Lusaka, Zambia. *AIDS Care* 20: 311–317.

## Editors' Summary

**Background.** Since 1981, AIDS has killed more than 25 million people, and about 33 million people (mostly in low- and middle-income countries) are now infected with HIV, the virus that causes AIDS. Because HIV destroys immune system cells, HIV-positive individuals are very susceptible to other infections, and, early in the AIDS epidemic, most HIV-infected people died within ten years of contracting the virus. Then, in 1996, antiretroviral therapy (ART)—a cocktail of drugs that keeps HIV in check—became available. For people living in developed countries, HIV infection became a chronic condition. However, for people living in developing countries, ART was prohibitively expensive, and HIV/AIDS remained a fatal illness. In 2003, this situation was declared a global emergency, and governments, international agencies, and funding bodies began to implement plans to increase ART coverage in resource-limited countries. By the end of 2009, more than a third of people living in these countries who needed ART were receiving it.

**Why Was This Study Done?** Because ART does not cure HIV infection, patients have to take antiretroviral drugs regularly for the rest of their lives. But in some ART programs, more than a third of patients are lost to follow-up (LTFU), that is, they stop coming for treatment, within three years of starting treatment. Patient attrition threatens the success of ART programs, but to understand why it occurs, a standardized method for classifying patients as LTFU is essential. Classification of patients as LTFU relies on an interval-based definition of LTFU. That is, a patient who fails to attend a clinic within a specified interval after a previous visit is classified as LTFU. If this interval is too short, although many patients will be accurately identified as LTFU, there will be a high false-positive rate—some patients classified as LTFU will actually return to the clinic later. Conversely, if the interval is too long, some patients who are truly LTFU will be misclassified as active (a false-negative classification). In this study, the researchers analyzed data from health facilities across Africa, Asia, and Latin America to determine a standard definition for LTFU that minimizes patient misclassification.

**What Did the Researchers Do and Find?** Using data collected from 111 health facilities by the International Epidemiologic Databases to Evaluate AIDS (IeDEA) Collaboration, the researchers categorized patients receiving ART at each facility at a “status classification” date (12 months before the facility’s last data export to IeDEA) as active or LTFU using a range of intervals (thresholds) since their last clinic visit. For example, for a test interval of 200 days, patients who had not revisited the clinic within 200 days of their previous visit at the status classification date were classified as LTFU; patients who had revisited the clinic were classified as active. The researchers then looked forward 365

days from the status classification date to assess the performance and accuracy of these classifications. So, a “LTFU” patient who visited the clinic anytime during the year after the status classification date represented a false-positive classification, and an “active” patient who did not return within the ensuing year represented a false-negative classification. When data from all the facilities were pooled, a threshold of 180 days produced the fewest misclassifications. At the facility level, the best-performing threshold for patient classification ranged from 58 to 383 days (with an average of 150 days), but application of a 180-day threshold to individual facilities only slightly increased misclassifications. Finally, using the 180-day threshold, average LTFU at individual facilities was 19.9%.

**What Do These Findings Mean?** Based on these findings, the researchers recommend that the standard definition for LTFU should be when it has been 180 days or more since the patient’s last clinic visit. Given the wide range of best-performing definitions among facilities, however, they recognize that local, national, or regional definitions of LTFU may be more appropriate in certain contexts. Adoption of a standard definition for LTFU, the researchers note, should facilitate harmonization of monitoring and evaluation of ART programs across the world and should help to identify “best practices” associated with low LTFU rates. Importantly, it should also provide the necessary framework for research designed to improve patient retention in ART programs, thereby helping to maximize and sustain the health gains from HIV treatment programs.

**Additional Information.** Please access these websites via the online version of this summary at <http://dx.doi.org/10.1371/journal.pmed.1001111>.

- Information is available from the US National Institute of Allergy and Infectious Diseases on HIV infection and AIDS
- NAM/aidsmap provides basic information about HIV/AIDS and summaries of recent research findings on HIV care and treatment
- Information is available from Avert, an international AIDS charity on many aspects of HIV/AIDS, including information on HIV/AIDS treatment and care and on universal access to AIDS treatment (in English and Spanish)
- The World Health Organization provides information about universal access to AIDS treatment (in several languages)
- Information about the IeDEA Collaboration is available
- Patient stories about living with HIV/AIDS are available through Avert and through the charity website [Healthtalkonline](http://Healthtalkonline.org)
