# Supplementary material for: Universal Definition of Loss to Follow-Up in HIV Treatment Programs: A Statistical Analysis of 111 Facilities in Africa, Asia, and Latin America
Source: PLoS Med. 2011 Oct 25;8(10):e1001111. doi: 10.1371/journal.pmed.1001111 (PMC3201937; doi:10.1371/journal.pmed.1001111)
Supplement: Table S1 — Characteristics of the 111 health facilities included in this analysis. (PDF) [file pmed.1001111.s001.pdf]

| leDEA Region     | Health facility          | Patients | Rural vs. Urban | Public vs. Private | Facility Type | Active F/U Program | Free ART provided | Food Supplementation | Family-Centered Care |
|------------------|--------------------------|----------|-----------------|--------------------|---------------|--------------------|-------------------|----------------------|----------------------|
| Africa, Central  | Democratic Repub Congo 1 | 1,481    | Urban           | Private            | Clinic        | Yes                | Yes               | No                   | Yes                  |
|                  | Democratic Repub Congo 2 | 733      | Urban           | Private            | Clinic        | Yes                | Yes               | Yes                  | Yes                  |
|                  | Democratic Repub Congo 3 | 429      | Urban           | Private            | Clinic        | Yes                | Yes               | Yes                  | Yes                  |
|                  | Democratic Repub Congo 4 | 342      | Urban           | Private            | Clinic        | Yes                | Yes               | No                   | Yes                  |
|                  | Democratic Repub Congo 5 | 243      | Urban           | Private            | Clinic        | Yes                | Yes               | No                   | Yes                  |
| Africa, Eastern  | Kenya 1                  | 3,740    | Urban           | Public             | Hospital      | Yes                | Yes               | Yes                  | Yes                  |
|                  | Kenya 2                  | 1,772    | Urban           | Public             | Hospital      | Yes                | Yes               | Yes                  | Yes                  |
|                  | Kenya 3                  | 1,649    | Urban           | Public             | Hospital      | Yes                | Yes               | Yes                  | Yes                  |
|                  | Kenya 4                  | 1,480    | Urban           | Public             | Hospital      | Yes                | Yes               | Yes                  | Yes                  |
|                  | Kenya 5                  | 1,147    | Urban           | Public             | Clinic        | Yes                | Yes               | Yes                  | Yes                  |
|                  | Kenya 6                  | 930      | Urban           | Public             | Hospital      | Yes                | No                | Yes                  | Yes                  |
|                  | Kenya 7                  | 766      | Urban           | Public             | Clinic        | Yes                | Yes               | Yes                  | Yes                  |
|                  | Kenya 8                  | 667      | Urban           | Public             | Hospital      | Yes                | Yes               | Yes                  | Yes                  |
|                  | Kenya 9                  | 614      | Urban           | Public             | Clinic        | Yes                | Yes               | Yes                  | Yes                  |
|                  | Kenya 10                 | 382      | Urban           | Public             | Hospital      | Yes                | Yes               | Yes                  | No                   |
|                  | Kenya 11                 | 361      | Urban           | Public             | Hospital      | Yes                | Yes               | Yes                  | Yes                  |
|                  | Kenya 12                 | 349      | Rural           | Public             | Clinic        | Yes                | Yes               | Yes                  | Yes                  |
|                  | Tanzania 1               | 1,436    | Urban           | Public             | Hospital      | Yes                | Yes               | No                   | No                   |
|                  | Tanzania 2               | 717      | Urban           | Public             | Hospital      | Yes                | No                | Yes                  | Yes                  |
|                  | Tanzania 3               | 365      | Urban           | Public             | Hospital      | No                 | Yes               | No                   | Yes                  |
| Africa, Southern | Uganda                   | 5,570    | Urban           | Public             | Hospital      | Yes                | Yes               | No                   | No                   |
|                  | Botswana                 | 1,652    | Urban           | Private            | Clinic        | Yes                | No                | No                   | No                   |
|                  | Malawi                   | 4,720    | Urban           | Public             | Hospital      | Yes                | Yes               | Yes                  | No                   |
|                  | South Africa 1           | 9,621    | Urban           | Public             | Hospital      | Yes                | Yes               | Yes                  | No                   |
|                  | South Africa 2           | 2,068    | Urban           | Private            | Hospital      | Yes                | Yes               | Yes                  | No                   |
|                  | South Africa 3           | 2,024    | Urban           | Public             | Clinic        | Yes                | Yes               | Yes                  | No                   |
|                  | South Africa 4           | 1,765    | Urban           | Public             | Clinic        | Yes                | Yes               | Yes                  | No                   |
|                  | South Africa 5           | 1,748    | Urban           | Public             | Clinic        | Yes                | Yes               | No                   | No                   |
|                  | South Africa 6           | 1,715    | Urban           | Public             | Hospital      | Yes                | Yes               | Yes                  | No                   |
|                  | South Africa 7           | 1,232    | Urban           | Public             | Clinic        | Yes                | Yes               | Yes                  | No                   |
|                  | South Africa 8           | 917      | Urban           | Private            | Clinic        | Yes                | Yes               | No                   | No                   |
|                  | South Africa 9           | 859      | Urban           | Private            | Hospital      | No                 | Yes               | No                   | No                   |
|                  | South Africa 10          | 705      | Urban           | Private            | Clinic        | Yes                | Yes               | No                   | No                   |
|                  | South Africa 11          | 649      | Urban           | Private            | Hospital      | No                 | Yes               | No                   | No                   |
|                  | South Africa 12          | 580      | Urban           | Private            | Hospital      | No                 | Yes               | No                   | No                   |
|                  | South Africa 13          | 410      | Urban           | Public             | Clinic        | Yes                | Yes               | No                   | No                   |
|                  | South Africa 14          | 404      | Urban           | Private            | Clinic        | Yes                | Yes               | No                   | No                   |
|                  | South Africa 15          | 352      | Urban           | Private            | Clinic        | No                 | Yes               | No                   | No                   |
|                  | South Africa 16          | 344      | Rural           | Private            | Clinic        | Yes                | Yes               | No                   | No                   |
|                  | South Africa 17          | 299      | Urban           | Private            | Clinic        | Yes                | Yes               | No                   | No                   |
|                  | South Africa 18          | 277      | Urban           | Private            | Clinic        | No                 | Yes               | No                   | No                   |
|                  | South Africa 19          | 211      | Urban           | Private            | Clinic        | Yes                | Yes               | No                   | No                   |
|                  | South Africa 20          | 207      | Urban           | Private            | Clinic        | Yes                | Yes               | No                   | No                   |
|                  | Zambia 1                 | 6,086    | Urban           | Public             | Clinic        | Yes                | Yes               | Yes                  | No                   |
|                  | Zambia 2                 | 5,412    | Urban           | Public             | Clinic        | Yes                | Yes               | Yes                  | No                   |
|                  | Zambia 3                 | 4,973    | Urban           | Public             | Hospital      | Yes                | Yes               | No                   | No                   |
|                  | Zambia 4                 | 4,535    | Urban           | Public             | Hospital      | Yes                | Yes               | No                   | No                   |
|                  | Zambia 5                 | 4,144    | Urban           | Public             | Clinic        | Yes                | Yes               | Yes                  | No                   |
|                  | Zambia 6                 | 3,743    | Urban           | Public             | Clinic        | Yes                | Yes               | Yes                  | No                   |
|                  | Zambia 7                 | 3,653    | Urban           | Public             | Clinic        | Yes                | Yes               | Yes                  | No                   |
|                  | Zambia 8                 | 3,637    | Urban           | Public             | Hospital      | Yes                | Yes               | No                   | No                   |
|                  | Zambia 9                 | 3,590    | Urban           | Public             | Clinic        | Yes                | Yes               | Yes                  | No                   |
|                  | Zambia 10                | 3,554    | Urban           | Public             | Clinic        | Yes                | Yes               | Yes                  | No                   |
|                  | Zambia 11                | 3,473    | Urban           | Public             | Hospital      | No                 | Yes               | No                   | No                   |
|                  | Zambia 12                | 3,150    | Urban           | Public             | Hospital      | Yes                | Yes               | No                   | No                   |
|                  | Zambia 13                | 3,048    | Urban           | Public             | Clinic        | Yes                | Yes               | Yes                  | No                   |
|                  | Zambia 14                | 3,009    | Urban           | Public             | Clinic        | Yes                | Yes               | Yes                  | No                   |
|                  | Zambia 15                | 2,925    | Urban           | Public             | Hospital      | Yes                | Yes               | No                   | No                   |
|                  | Zambia 16                | 2,599    | Urban           | Public             | Clinic        | Yes                | Yes               | Yes                  | No                   |
|                  | Zambia 17                | 2,282    | Urban           | Public             | Hospital      | No                 | Yes               | No                   | No                   |
|                  | Zambia 18                | 2,170    | Urban           | Public             | Clinic        | Yes                | Yes               | Yes                  | No                   |
|                  | Zambia 19                | 2,085    | Urban           | Private            | Clinic        | Yes                | Yes               | Yes                  | No                   |
|                  | Zambia 20                | 1,820    | Urban           | Private            | Clinic        | Yes                | Yes               | No                   | No                   |
|                  | Zambia 21                | 1,727    | Urban           | Public             | Clinic        | Yes                | Yes               | Yes                  | No                   |
|                  | Zambia 22                | 1,649    | Urban           | Public             | Hospital      | No                 | Yes               | No                   | No                   |
|                  | Zambia 23                | 1,602    | Urban           | Public             | Hospital      | No                 | Yes               | No                   | No                   |
|                  | Zambia 24                | 1,566    | Rural           | Public             | Clinic        | Yes                | Yes               | No                   | No                   |
|                  | Zambia 25                | 1,439    | Urban           | Public             | Hospital      | Yes                | Yes               | Yes                  | No                   |
|                  | Zambia 26                | 1,372    | Urban           | Public             | Hospital      | No                 | Yes               | No                   | No                   |

|                 |                 |       |       |         |          |     |     |     |     |
|-----------------|-----------------|-------|-------|---------|----------|-----|-----|-----|-----|
|                 | Zambia 27       | 1,352 | Rural | Public  | Hospital | No  | Yes | No  | No  |
|                 | Zambia 28       | 1,338 | Urban | Public  | Clinic   | Yes | Yes | No  | No  |
|                 | Zambia 29       | 1,257 | Urban | Private | Clinic   | Yes | Yes | Yes | No  |
|                 | Zambia 30       | 1,222 | Urban | Public  | Hospital | No  | Yes | No  | No  |
|                 | Zambia 31       | 1,183 | Urban | Public  | Hospital | No  | Yes | No  | No  |
|                 | Zambia 32       | 1,177 | Urban | Public  | Clinic   | Yes | Yes | Yes | No  |
|                 | Zambia 33       | 1,094 | Urban | Public  | Hospital | No  | Yes | No  | No  |
|                 | Zambia 34       | 1,091 | Rural | Public  | Clinic   | Yes | Yes | Yes | No  |
|                 | Zambia 35       | 921   | Urban | Public  | Clinic   | Yes | Yes | Yes | No  |
|                 | Zambia 36       | 844   | Urban | Public  | Clinic   | No  | Yes | No  | No  |
|                 | Zambia 37       | 841   | Urban | Private | Hospital | No  | Yes | No  | No  |
|                 | Zambia 38       | 642   | Urban | Public  | Clinic   | Yes | Yes | No  | No  |
|                 | Zambia 39       | 593   | Urban | Public  | Clinic   | Yes | Yes | Yes | No  |
|                 | Zambia 40       | 577   | Urban | Public  | Hospital | No  | Yes | No  | No  |
|                 | Zambia 41       | 543   | Rural | Public  | Clinic   | Yes | Yes | No  | No  |
|                 | Zambia 42       | 484   | Urban | Private | Clinic   | No  | Yes | No  | No  |
|                 | Zambia 43       | 414   | Urban | Public  | Clinic   | No  | Yes | No  | No  |
|                 | Zambia 44       | 397   | Rural | Public  | Clinic   | No  | Yes | No  | No  |
|                 | Zambia 45       | 320   | Rural | Public  | Clinic   | Yes | Yes | No  | No  |
|                 | Zambia 46       | 307   | Rural | Public  | Hospital | No  | Yes | No  | No  |
|                 | Zambia 47       | 287   | Rural | Private | Clinic   | Yes | Yes | No  | No  |
|                 | Zimbabwe 1      | 1,621 | Urban | Private | Clinic   | Yes | Yes | Yes | No  |
|                 | Zimbabwe 2      | 1,194 | Rural | Public  | Hospital | Yes | Yes | No  | Yes |
|                 | Zimbabwe 3      | 885   | Rural | Public  | Hospital | Yes | Yes | No  | Yes |
| Africa, Western | Benin           | 788   | Urban | Public  | Hospital | Yes | Yes | Yes | No  |
|                 | Cote d'Ivoire 1 | 4,066 | Urban | Public  | Hospital | Yes | Yes | No  | No  |
|                 | Cote d'Ivoire 2 | 2,638 | Urban | Private | Clinic   | Yes | Yes | No  | Yes |
|                 | Cote d'Ivoire 3 | 2,140 | Urban | Public  | Clinic   | Yes | Yes | Yes | Yes |
|                 | Cote d'Ivoire 4 | 2,058 | Urban | Private | Hospital | No  | No  | Yes | Yes |
|                 | Cote d'Ivoire 5 | 734   | Urban | Public  | Clinic   | Yes | Yes | No  | Yes |
|                 | Cote d'Ivoire 6 | 419   | Urban | Public  | Hospital | Yes | Yes | No  | Yes |
|                 | Nigeria 1       | 4,165 | Urban | Public  | Hospital | No  | Yes | No  | Yes |
|                 | Nigeria 2       | 3,441 | Urban | Public  | Hospital | Yes | Yes | Yes | Yes |
| Asia            | Senegal         | 259   | Urban | Public  | Hospital | Yes | Yes | Yes | No  |
|                 | India           | 257   | Urban | Private | Hospital | Yes | Yes | No  | Yes |
|                 | Malaysia        | 237   | Urban | Public  | Hospital | Yes | No  | No  | Yes |
|                 | Taiwan          | 249   | Urban | Public  | Hospital | Yes | Yes | Yes | Yes |
|                 | Thailand 1      | 416   | Urban | Public  | Hospital | Yes | No  | No  | No  |
|                 | Thailand 2      | 268   | Urban | Public  | Hospital | Yes | No  | No  | Yes |
|                 | Thailand 3      | 224   | Urban | Public  | Hospital | Yes | No  | No  | Yes |
| Latin America   | Honduras        | 211   | Urban | Public  | Hospital | Yes | Yes | Yes | Yes |
|                 | Mexico          | 389   | Urban | Public  | Hospital | No  | Yes | No  | Yes |
